# Supplementary material for: Comparison of Corneal Densitometry and Visual Quality after Small Incision Lenticule Extraction (SMILE) and Laser Epithelial Keratomileusis (LASEK): One‐Year Comparative Study
Source: Hindawi journal article supplement (doi:10.1155/2023/3430742), 2023-01-01
Supplement: f1 [file 3430742.f1.pdf]

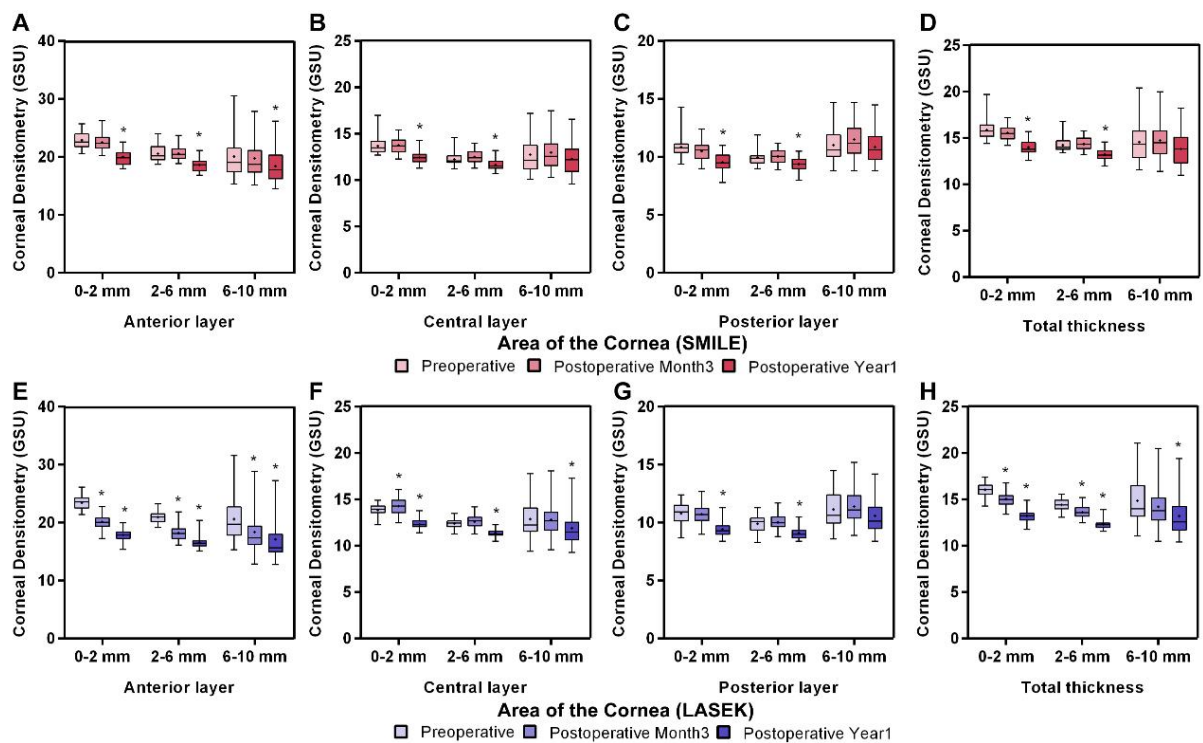

**Supplementary Figure S1: Time course of corneal densitometry in the SMILE and LASEK groups.** (A) SMILE and (B) LASEK groups.  $*p < 0.05$ , significantly different from the preoperative values in the SMILE and LASEK groups.

SMILE: small incision lenticule extraction, LASEK: laser epithelial keratomileusis

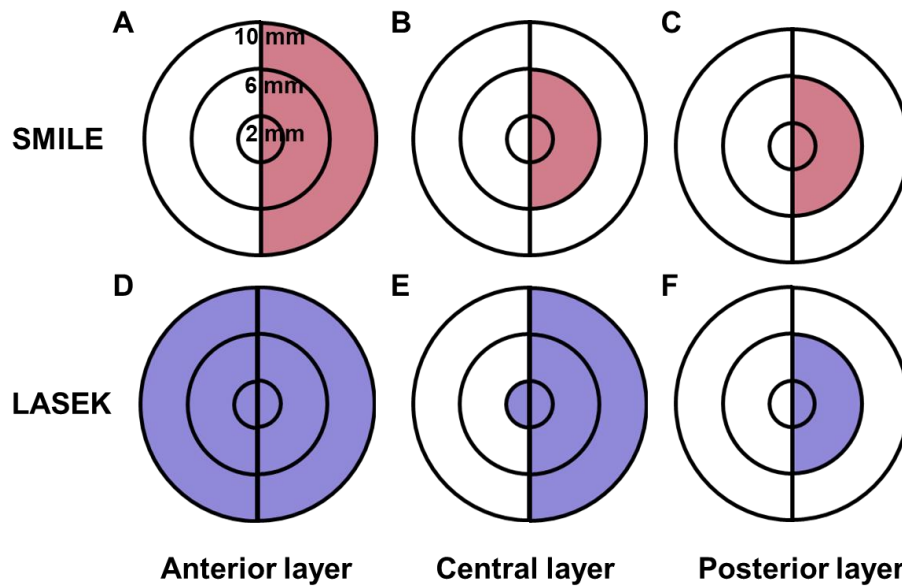

**Supplementary Figure S2: Diagram of changes of CD values of three layers after SMILE and LASEK.** (A-C) Diagram of changes in CD relative to baseline (red represents a statistically significant reduction) in the SMILE group. (D-E) Diagram of the changes in CD relative to baseline (purple represents a statistically significant reduction) in the LASEK group. Left semicircle: postoperative month 3; Right semicircle: postoperative year 1.

SMILE: small incision lenticule extraction, LASEK: laser epithelial keratomileusis, CD: corneal densitometry
